# Supplementary material for: Development and content validity of the evaluation of multidimensional functioning and risks in aging scale
Source: PeerJ. 2025 Dec 9;13:e20108. doi: 10.7717/peerj.20108 (PMC12700117; doi:10.7717/peerj.20108)
Supplement: Supplemental Information 6 [file peerj-13-20108-s006.xlsx]

## Sheet: Clinicians Database
Clinician participant number	Age (years)	Sex	Nationality	Native language	Spanish from spain language level	Contry of residence	Autonomous Community of residence	Academic level	Profession	Curren job	Clinical practice experience (years)	Clinical practice experience with older adults (years)	Clinical practice experience in other frail populations (years)	Clinical practice experience using tests and evaluation procedures (years)	EMFRA - Administration difficulty	EMFRA - Determining final punctuation difficulty
HC Proff - 1	32	Male	Spanish	Spanish from spain	Native	Spain	Madrid	MSc	Physiotherapist, Podiatrist	Private healthcare service, University teaching staff	10	10	8	8	Quite difficult	Somewhat difficult
HC Proff - 2	22	Male	Spanish	Spanish from spain	Native	Spain	Madrid	Bachelor	Physiotherapist	Private healthcare service	0.6	0	0	0.6	Not difficult at all	Not difficult at all
HC Proff - 3	23	Male	Spanish	Spanish from spain	Native	Spain	Madrid	Bachelor	Physiotherapist	Unemployed	0.3	0.3	0.1	0.2	Somewhat difficult	Not difficult at all
HC Proff - 4	33	Female	Spanish	Spanish from spain	Native	Spain	Madrid	PhD	Physiotherapist	University teaching staff	11	1	5	8	Slightly difficult	Not difficult at all
HC Proff - 5	23	Male	Spanish	Spanish from spain	Native	Spain	Madrid	Predoctoral student	Physiotherapist	Unemployed	1	0	0	1	Somewhat difficult	Not difficult at all
HC Proff - 6	29	Female	Italian	Italian	C2	Spain	Madrid	Predoctoral student	Physiotherapist, Informatitian	Private healthcare service, University teaching staff, Research staff	8	0	0	4	Somewhat difficult	Slightly difficult
HC Proff - 7	23	Female	Spanish	Spanish from spain	Native	Spain	Madrid	Bachelor	Podiatrist	Private healthcare service, University teaching staff	0.7	0.7	0.7	0.7	Somewhat difficult	Not difficult at all
HC Proff - 8	26	Male	Spanish	Spanish from spain	Native	Spain	Madrid	MSc	Physiotherapist	Private healthcare service, Domiciliary attention	3	3	3	3	Quite difficult	Not difficult at all
HC Proff - 9	25	Male	Spanish	Spanish from spain	Native	Spain	Madrid	MSc	Physiotherapist	Public healthcare system, Domiciliary attention	3	3	3	2	Somewhat difficult	Somewhat difficult
HC Proff - 10	28	Male	Spanish	Spanish from spain	Native	Spain	Madrid	Predoctoral student	Physiotherapist	Private healthcare service, Domiciliary attention	6	6	3	3	Slightly difficult	Not difficult at all
