# Supplementary material for: Development and content validity of the evaluation of multidimensional functioning and risks in aging scale
Source: PeerJ. 2025 Dec 9;13:e20108. doi: 10.7717/peerj.20108 (PMC12700117; doi:10.7717/peerj.20108)
Supplement: Supplemental Information 7 [file peerj-13-20108-s007.xlsx]

## Sheet: Raw Data
Participant number	Age (years)	Sex	Nationality	Native language	Country of residence	Autonomous community of residence	Educational level	Profession	Employment status	Clinical practice experience with older adults (years)	Research experience with older adults (years)	Clinical practice experience with frail populations (years)	Research experience with frail populations (years)	Clinical practice experience with measurement tools (years)	Research experience with measurement tools (years)	Clinical practice experience with frailty measurement tools (years)	Research experience with frailty measurement tools (years)	Current participation in other projects with frail older adults (n, %)	Previous participation in content validation processes (n)	Item nº1 - Item comprehension	Item nº1 - Response/Scoring system comprehension	Item nº1 - Measurement procedure suitability	Item nº1 - Item coherence	Item nº1 - Response/Scoring system coherence	Item nº1 - Item relevance	Item nº1 - Item suggestions for modification	Item nº1 - Measurement procedure suggestions for modification	Item nº1 - Response/Scoring system suggestions for modification	Item nº2 - Item comprehension	Item nº2 - Response/Scoring system comprehension	Item nº2 - Response/Scoring system comprehension2	Item nº2 - Item coherence	Item nº2 - Response/Scoring system coherence	Item nº2 - Item relevance	Item nº2 - Item suggestions for modification	Item nº2 - Measurement procedure suggestions for modification	Item nº2 - Response/Scoring system suggestions for modification	Item nº3 - Item comprehension	Item nº3 - Response/Scoring system comprehension	Item nº3 - Response/Scoring system comprehension2	Item nº3 - Item coherence	Item nº3 - Response/Scoring system coherence	Item nº3 - Item relevance	Item nº3 - Item suggestions for modification	Item nº3 - Measurement procedure suggestions for modification	Item nº3 - Response/Scoring system suggestions for modification	Item nº4 - Item comprehension	Item nº4 - Response/Scoring system comprehension	Item nº4 - Response/Scoring system comprehension2
1	37	Male	Spanish	Spanish from spain	Spain	Madrid	PhD	Physiotherapist, Exercise professional	University teaching staff, Research staff	13	8	13	8	13	13	13	3	Sí	2	Totalmente de acuerdo	Totalmente de acuerdo	De acuerdo	Totalmente de acuerdo	Totalmente de acuerdo	De acuerdo		"No se utilizarán comandos verbales para animar o instigar a alcanzar la fuerza máxima." Es fundamental conseguir el máximo reclutamiento motor y para ello sería válido el uso de una motivación externa. Añadiría ademas, que la fuerza se debe hacer de forma progresiva (ya que la velocidad aquí no es importante) durante 3-6 segundos para que fuese menos lesiva.	Se debería recalcar en su concepto que es para la fuerza máxima, no para todos los tipos de fuerza (por ejemplo la resistencia o la potencia)	De acuerdo	Totalmente de acuerdo	De acuerdo	Totalmente de acuerdo	Totalmente de acuerdo	Totalmente de acuerdo		"el participante debe comenzar a caminar a velocidad normal 2,4 m en linea recta" Si es una prueba de velocidad se debería indicar que debe andar lo más rápido posible sin que ello afecte a una biomecánica normal (evitar compensaciones)		Totalmente de acuerdo	Totalmente de acuerdo	Totalmente de acuerdo	Totalmente de acuerdo	Totalmente de acuerdo	Totalmente de acuerdo				Totalmente de acuerdo	Totalmente de acuerdo	Totalmente de acuerdo
2	52	Male	Spanish	Spanish from spain	Spain	Canary Islands	PhD	Physiotherapist	Public healthcare service, Private healthcare service, University teaching staff, Research staff	10	9	10	9	10	7	10	7	Sí	5	Totalmente de acuerdo	Totalmente de acuerdo	Totalmente de acuerdo	Totalmente de acuerdo	Totalmente de acuerdo	Totalmente de acuerdo				Totalmente de acuerdo	Totalmente de acuerdo	Totalmente de acuerdo	Totalmente de acuerdo	Totalmente de acuerdo	Totalmente de acuerdo				Totalmente de acuerdo	Totalmente de acuerdo	Totalmente de acuerdo	Totalmente de acuerdo	Totalmente de acuerdo	Totalmente de acuerdo				Totalmente de acuerdo	Totalmente de acuerdo	Totalmente de acuerdo
3	42	Female	Spanish	Spanish from spain	Spain	Madrid	PhD	Physiotherapist, Physician	University teaching staff	13	14	13	7	13	9	13	6	Sí	4	Totalmente de acuerdo	Totalmente de acuerdo	Totalmente de acuerdo	Totalmente de acuerdo	Totalmente de acuerdo	Totalmente de acuerdo				Totalmente de acuerdo	Totalmente de acuerdo	Totalmente de acuerdo	Totalmente de acuerdo	Totalmente de acuerdo	Totalmente de acuerdo				Totalmente de acuerdo	Totalmente de acuerdo	Totalmente de acuerdo	Totalmente de acuerdo	Totalmente de acuerdo	Totalmente de acuerdo				Totalmente de acuerdo	Totalmente de acuerdo	Totalmente de acuerdo
4	57	Male	Spanish	Spanish from spain	Spain	Madrid	PhD	Psychologist	University teaching staff	0	0	7	0	10	10	0	0	No	5	Totalmente de acuerdo	Totalmente de acuerdo	Totalmente de acuerdo	Totalmente de acuerdo	Totalmente de acuerdo	Totalmente de acuerdo				Totalmente de acuerdo	Totalmente de acuerdo	Totalmente de acuerdo	Totalmente de acuerdo	Totalmente de acuerdo	Totalmente de acuerdo				Totalmente de acuerdo	Totalmente de acuerdo	Totalmente de acuerdo	Totalmente de acuerdo	Totalmente de acuerdo	Totalmente de acuerdo				Totalmente de acuerdo	De acuerdo	De acuerdo
5	51	Male	Spanish	Spanish from spain	Spain	Madrid	PhD	Occupational therapist	University teaching staff, Research staff	10	7	10	7	10	7	10	7	Sí	2	Totalmente de acuerdo	Totalmente de acuerdo	Totalmente de acuerdo	Totalmente de acuerdo	Totalmente de acuerdo	Totalmente de acuerdo	Podría explicitarse el uso de un dinamómetro analógico o también se considera si puede ser digital			De acuerdo	Ni de acuerdo ni en desacuerdo	En desacuerdo	Totalmente de acuerdo	Totalmente de acuerdo	Totalmente de acuerdo	¿No se toma en cuenta el arranque y el frenado? El inicio de la marcha puede estar sesgado por las funciones cogntivas y física, así como el frenado. Si el item es velocidad de la marcha, sería más adecuado que la persona iniciara la marcha unos metros antes y finalizará más alla de los 2,4 para no contemplar el frenado.	No queda claro si se toma el máximos valor o se promedian los dos registros		Totalmente de acuerdo	Totalmente de acuerdo	Totalmente de acuerdo	Totalmente de acuerdo	Totalmente de acuerdo	Totalmente de acuerdo	podría ser útil también poner "ortesis" (antiequinos son muy típicos...)			Ni de acuerdo ni en desacuerdo	Totalmente de acuerdo	Totalmente de acuerdo
6	30	Female	Spanish	Spanish from spain	Spain	Madrid	PhD	Physiotherapist	Private healthcare service, University teaching staff, Research staff	8	8	8	7	8	7	8	7	No	1	Totalmente de acuerdo	Totalmente de acuerdo	Totalmente de acuerdo	De acuerdo	Totalmente de acuerdo	Totalmente de acuerdo				Totalmente de acuerdo	Totalmente de acuerdo	Totalmente de acuerdo	Totalmente de acuerdo	Totalmente de acuerdo	Totalmente de acuerdo	Se tendrá en cuenta la realización de la prueba con ayuda para el resultado o la interpretación?			Totalmente de acuerdo	Totalmente de acuerdo	Totalmente de acuerdo	Totalmente de acuerdo	Totalmente de acuerdo	Totalmente de acuerdo				Totalmente de acuerdo	De acuerdo	Totalmente de acuerdo
7	27	Male	Spanish	Spanish from spain	Spain	Madrid	Bachelor	Physiotherapist	Private healthcare service	5	0	5	0	5	0	5	0	No	0	Totalmente de acuerdo	Totalmente de acuerdo	Totalmente de acuerdo	Totalmente de acuerdo	Totalmente de acuerdo	Totalmente de acuerdo				De acuerdo	Totalmente de acuerdo	De acuerdo	Totalmente de acuerdo	Totalmente de acuerdo	Totalmente de acuerdo		Podría incluir información sobre si el inicio del cronómetro es cuando se da la orden de avanzar o cuando empieza el paciente la marcha. También podría aparecer si se educa al paciente en no decelerar al final de la distancia y seguir caminando. ¿"Llegar a la meta" para parar el cronómetro significa tocar la línea del cono o sobrepasarla completamente?		Totalmente de acuerdo	Totalmente de acuerdo	Totalmente de acuerdo	Totalmente de acuerdo	Totalmente de acuerdo	Totalmente de acuerdo				Totalmente de acuerdo	Totalmente de acuerdo	Totalmente de acuerdo
8	53	Male	Spanish	Spanish from spain	Spain	Canary Islands	Predoctoral student	Physiotherapist	Public healthcare service, University teaching staff, Research staff	20	0	20	5	10	10	10	10	No	0	Totalmente de acuerdo	Totalmente de acuerdo	Totalmente de acuerdo	De acuerdo	De acuerdo	Ni de acuerdo ni en desacuerdo				Totalmente de acuerdo	Totalmente de acuerdo	Totalmente de acuerdo	Totalmente de acuerdo	Totalmente de acuerdo	Ni de acuerdo ni en desacuerdo				Totalmente de acuerdo	Totalmente de acuerdo	Totalmente de acuerdo	Totalmente de acuerdo	Totalmente de acuerdo	Ni de acuerdo ni en desacuerdo				Totalmente de acuerdo	Totalmente de acuerdo	Totalmente de acuerdo
9	28	Male	Spanish	Spanish from spain	Spain	Madrid	Master	Physiotherapist	Public healthcare service	5	0	5	0	2	1	1	0	Sí	0	Totalmente de acuerdo	Totalmente de acuerdo	Totalmente de acuerdo	Totalmente de acuerdo	Totalmente de acuerdo	De acuerdo				Totalmente de acuerdo	De acuerdo	De acuerdo	Totalmente de acuerdo	Totalmente de acuerdo	De acuerdo		Para la práctica clínica creo que es preferible establecer los rangos de tiempo para cada puntuación y no necesitar hacer la división para transformar el valor del tiempo a velocidad (m/s). El hecho de eliminar este paso le da más rapidez al procedimiento y más facilidad para implementarlo.		Totalmente de acuerdo	Totalmente de acuerdo	Totalmente de acuerdo	De acuerdo	Totalmente de acuerdo	De acuerdo				Totalmente de acuerdo	Totalmente de acuerdo	De acuerdo
10	40	Female	Spanish	Spanish from spain	Spain	Madrid	PhD	Occupational therapist	Private healthcare service, University teaching staff	6	4	10	4	10	4	10	4	No	1	Totalmente de acuerdo	Totalmente de acuerdo	Totalmente de acuerdo	Ni de acuerdo ni en desacuerdo	Totalmente de acuerdo	Ni de acuerdo ni en desacuerdo	Entendiendo su correlación con mortalidad, creo que hay otros indicadores/escalas para medir la debilidad			Totalmente de acuerdo	Totalmente de acuerdo	De acuerdo	Totalmente de acuerdo	De acuerdo	De acuerdo		Considero importante describir y, en la medida de lo posible, cuantificar el nivel de dispositivos de ayuda que necesita el paciente	Incluir este aspecto cualitativo sobre ayudas técnicas, asi como otros aspectos relevantes de la marcha (avance del pie, altura durante la oscilación, etc),que son tan importantes como la velocidad	En desacuerdo	Totalmente de acuerdo	Totalmente de acuerdo	De acuerdo	Totalmente de acuerdo	De acuerdo	Creo que se debe distinguir entre caminar por casa y caminar por el entorno. Esta diferencia de contexto en muchas ocasiones es la determinante para el uso de los dispositivos. También es importante saber la distancia.			En desacuerdo	Totalmente de acuerdo	Totalmente de acuerdo
11	29	Female	Spanish	Spanish from spain	Spain	Madrid	Predoctoral student	Physiotherapist, Occupational therapist	University teaching staff, Research staff	5	3	3	2	5	6	5	3	No	0	Totalmente de acuerdo	Totalmente de acuerdo	De acuerdo	De acuerdo	Ni de acuerdo ni en desacuerdo	De acuerdo			Añadiría otra categoría entre el 0 y 18 kg	De acuerdo	De acuerdo	Ni de acuerdo ni en desacuerdo	Ni de acuerdo ni en desacuerdo	De acuerdo	De acuerdo		Me parece poca distancia a recorrer por parte del sujeto. Considero que no habría que incluir un rango de descanso (30-90 segundos) sino un único tiempo (ej: 90 seg).		Totalmente de acuerdo	De acuerdo	De acuerdo	De acuerdo	Totalmente en desacuerdo	Totalmente de acuerdo			No se puede puntuar de la misma forma en base a la frecuencia de la ayuda sin tener en cuenta el tipo de ayuda. Ej: no debería obtener la misma puntuación una persona que utilice de forma frecuente un bastón respecto a una persona que utilice de forma frecuente un andador.	En desacuerdo	De acuerdo	De acuerdo
12	46	Female	Spanish	Spanish from spain	Spain	Madrid	Master	Occupational therapist	University teaching staff, Research staff	20	5	2	2	20	1	20	0	No	0	Totalmente de acuerdo	Totalmente de acuerdo	Totalmente de acuerdo	Totalmente de acuerdo	De acuerdo	Totalmente de acuerdo				Totalmente de acuerdo	De acuerdo	Totalmente de acuerdo	De acuerdo	De acuerdo	De acuerdo		Me parece muy apropiado que se haya incluido el uso del Productos de Apoyo para realizar la medición.		De acuerdo	De acuerdo	En desacuerdo	En desacuerdo	En desacuerdo	Totalmente de acuerdo			La medida de frecuencia de asistencia a la deambulación no puede separarse del tipo de ayuda. No debería puntuar igual llevar siempre un bastón, pero no precisar apoyo de un tercero que tener que ir siempre acompañado de otra persona.	En desacuerdo	En desacuerdo	En desacuerdo
13	49	Female	Spanish	Spanish from spain	Spain	Madrid	PhD	Podiatrist	University teaching staff, Research staff	15	0	0	0	2	3	0	0	No	0	Totalmente de acuerdo	Totalmente de acuerdo	Totalmente de acuerdo	Totalmente de acuerdo	Totalmente de acuerdo	Totalmente de acuerdo	Me parece adecuado para valorar la función física.	Me parece adecuado el proceso de medición.	Me parece adecuado el sistema de puntuación.	Totalmente de acuerdo	Totalmente de acuerdo	Totalmente de acuerdo	Totalmente de acuerdo	Totalmente de acuerdo	Totalmente de acuerdo	Me parece adecuado para evaluar la función física.	Modificaría la última frase para quitar la parte "se transformará el tiempo a velocidad". Creo que es más correcto "se calculará la velocidad de la prueba dividiendo la distancia recorrida (2,4m) entre el tiempo empleado en recorrerla".	Me parece adecuado.	Totalmente de acuerdo	Totalmente de acuerdo	Totalmente de acuerdo	Totalmente de acuerdo	Totalmente de acuerdo	Totalmente de acuerdo	Modificaría la pregunta colocando los paréntesis al final para no interrumpir la frase. "¿Suele necesitar la ayuda de alguien o de algún dispositivo para caminar? (bastón, muletas, andador, etc.).	Me parece bien.	Me parece bien.	Totalmente de acuerdo	Totalmente de acuerdo	Totalmente de acuerdo
14	52	Female	Spanish	Spanish from spain	Spain	Madrid	PhD	Physiotherapist, Occupational therapist	University teaching staff	10	10	0	0	10	10	5	10	No	3	Totalmente de acuerdo	Totalmente de acuerdo	Totalmente de acuerdo	Totalmente de acuerdo	Totalmente de acuerdo	Totalmente de acuerdo				Ni de acuerdo ni en desacuerdo	De acuerdo	De acuerdo	Ni de acuerdo ni en desacuerdo	De acuerdo	Ni de acuerdo ni en desacuerdo	El inicio y final marcados por conos. Dependiendo de las dimensiones de los conos se puede alterar la longitud del recorrido siendo éste tan corto. Sugerencia: se podría señalar con cinta aislante. No queda claro si se hace una media de las dos medidas que se recogen.			Totalmente de acuerdo	Totalmente de acuerdo	Totalmente de acuerdo	Totalmente de acuerdo	Totalmente de acuerdo	Totalmente de acuerdo				Totalmente de acuerdo	Totalmente de acuerdo	Totalmente de acuerdo
15	39	Male	Spanish	Spanish from spain	Spain	Madrid	PhD	Physiotherapist	University teaching staff, Research staff, Political staff	12	8	12	8	8	8	12	8	Sí	5	Totalmente de acuerdo	Totalmente de acuerdo	Totalmente de acuerdo	Totalmente de acuerdo	Totalmente de acuerdo	Totalmente de acuerdo				Totalmente de acuerdo	De acuerdo	Totalmente de acuerdo	Totalmente de acuerdo	De acuerdo	Totalmente de acuerdo		Entiendo que está basado en literatura previa, pero quizá sería conveniente simplificarlo porque medir 0,8 metros puede resultar complejo en un contexto clínico, y convendría valorar si los 20cm de diferencia con una medida más estandarizada como pueda ser 1m suponen una diferencia significativa para la puntuación del item.		Totalmente de acuerdo	Totalmente de acuerdo	Totalmente de acuerdo	Totalmente de acuerdo	Totalmente de acuerdo	Totalmente de acuerdo				Totalmente de acuerdo	Totalmente de acuerdo	Totalmente de acuerdo
[truncated: 186 more columns]

## Sheet: Aikens V
Item number	Item name	Assessment	Subject nº1	Subject nº2	Subject nº3	Subject nº4	Subject nº5	Subject nº6	Subject nº7	Subject nº8	Subject nº9	Subject nº10	Subject nº11	Subject nº12	Subject nº13	Subject nº14	Subject nº15	Recuento Jueces	Scale Minimum Value	Scale Maximum Value	Aiken's V	V <0.7
Ítem Nº1	Hand-grip strength	Item - Comprehension	5	5	5	5	5	5	5	5	5	5	5	5	5	5	5	15	1	5	1	No		0.5
Ítem Nº1	Hand-grip strength	Response / Punctuation system - Comprehension	5	5	5	5	5	5	5	5	5	5	5	5	5	5	5	15	1	5	1	No		0.5
Ítem Nº1	Hand-grip strength	Item - Coherence	5	5	5	5	5	4	5	4	5	3	4	5	5	5	5	15	1	5	0.916667	No		0.466667
Ítem Nº1	Hand-grip strength	Response / Punctuation system - Coherence	5	5	5	5	5	5	5	4	5	5	3	4	5	5	5	15	1	5	0.933333	No		0.483333
Ítem Nº1	Hand-grip strength	Item - Relevance	4	5	5	5	5	5	5	3	4	3	4	5	5	5	5	15	1	5	0.883333	No		0.433333
Ítem Nº1	Hand-grip strength	Measurement procedure suitability	4	5	5	5	5	5	5	5	5	5	4	5	5	5	5	15	1	5	0.966667	No		0.483333
Ítem Nº2	Gait speed	Item - Comprehension	4	5	5	5	4	5	4	5	5	5	4	5	5	3	5	15	1	5	0.9	No
Ítem Nº2	Gait speed	Response / Punctuation system - Comprehension	5	5	5	5	3	5	5	5	4	5	4	4	5	4	4	15	1	5	0.883333	No
Ítem Nº2	Gait speed	Item - Coherence	5	5	5	5	5	5	5	5	5	5	3	4	5	3	5	15	1	5	0.916667	No
Ítem Nº2	Gait speed	Response / Punctuation system - Coherence	5	5	5	5	5	5	5	5	5	4	4	4	5	4	4	15	1	5	0.916667	No
Ítem Nº2	Gait speed	Item - Relevance	5	5	5	5	5	5	5	3	4	4	4	4	5	3	5	15	1	5	0.866667	No
Ítem Nº2	Gait speed	Measurement procedure suitability	4	5	5	5	2	5	4	5	4	4	3	5	5	4	5	15	1	5	0.833333	No
Ítem Nº3	Gait assistance	Item - Comprehension	5	5	5	5	5	5	5	5	5	2	5	4	5	5	5	15	1	5	0.933333	No
Ítem Nº3	Gait assistance	Response / Punctuation system - Comprehension	5	5	5	5	5	5	5	5	5	5	4	4	5	5	5	15	1	5	0.966667	No
Ítem Nº3	Gait assistance	Item - Coherence	5	5	5	5	5	5	5	5	4	4	4	2	5	5	5	15	1	5	0.9	No
Ítem Nº3	Gait assistance	Response / Punctuation system - Coherence	5	5	5	5	5	5	5	5	5	5	1	2	5	5	5	15	1	5	0.883333	No
Ítem Nº3	Gait assistance	Item - Relevance	5	5	5	5	5	5	5	3	4	4	5	5	5	5	5	15	1	5	0.933333	No
Ítem Nº3	Gait assistance	Measurement procedure suitability	5	5	5	5	5	5	5	5	5	5	4	2	5	5	5	15	1	5	0.933333	No
Ítem Nº4	Balance	Item - Comprehension	5	5	5	5	3	5	5	5	5	2	2	2	5	5	5	15	1	5	0.816667	No
Ítem Nº4	Balance	Response / Punctuation system - Comprehension	5	5	5	4	5	4	5	5	5	5	4	2	5	5	5	15	1	5	0.9	No
Ítem Nº4	Balance	Item - Coherence	5	5	5	5	5	5	5	5	5	2	4	4	5	5	5	15	1	5	0.916667	No
Ítem Nº4	Balance	Response / Punctuation system - Coherence	5	5	5	5	5	4	5	5	5	5	4	2	5	5	5	15	1	5	0.916667	No
Ítem Nº4	Balance	Item - Relevance	5	5	5	5	5	5	5	3	5	2	4	4	5	5	5	15	1	5	0.883333	No
Ítem Nº4	Balance	Measurement procedure suitability	5	5	5	4	5	5	5	5	4	5	4	2	5	5	5	15	1	5	0.9	No
Ítem Nº5	Sedentarism	Item - Comprehension	5	5	5	5	5	5	5	2	5	5	5	4	5	5	5	15	1	5	0.933333	No
Ítem Nº5	Sedentarism	Response / Punctuation system - Comprehension	5	5	5	5	5	5	5	2	5	5	5	4	5	5	5	15	1	5	0.933333	No
Ítem Nº5	Sedentarism	Item - Coherence	5	5	5	5	5	5	5	2	4	3	5	4	5	4	5	15	1	5	0.866667	No
Ítem Nº5	Sedentarism	Response / Punctuation system - Coherence	5	5	5	5	5	5	5	2	2	2	4	4	5	4	5	15	1	5	0.8	No
Ítem Nº5	Sedentarism	Item - Relevance	5	5	5	5	5	5	5	3	3	3	5	4	5	4	5	15	1	5	0.866667	No
Ítem Nº5	Sedentarism	Measurement procedure suitability	5	5	5	5	5	5	5	2	5	2	5	4	5	5	5	15	1	5	0.883333	No
Ítem Nº6	Fatigue	Item - Comprehension	4	5	5	5	5	5	5	5	5	4	3	2	5	3	5	15	1	5	0.85	No
Ítem Nº6	Fatigue	Response / Punctuation system - Comprehension	5	5	5	5	5	5	5	5	5	4	4	3	5	3	5	15	1	5	0.9	No
Ítem Nº6	Fatigue	Item - Coherence	5	5	5	5	5	5	5	5	5	2	4	3	5	3	5	15	1	5	0.866667	No
Ítem Nº6	Fatigue	Response / Punctuation system - Coherence	5	5	5	5	5	5	5	5	5	4	4	3	5	4	5	15	1	5	0.916667	No
Ítem Nº6	Fatigue	Item - Relevance	5	5	5	5	5	5	5	3	5	2	5	3	5	4	5	15	1	5	0.866667	No
Ítem Nº6	Fatigue	Measurement procedure suitability	5	5	5	5	5	5	5	5	5	4	4	3	5	3	5	15	1	5	0.9	No
Ítem Nº7	Language	Item - Comprehension	5	5	5	4	5	5	5	3	5	5	3	3	4	2	4	15	1	5	0.8	No
Ítem Nº7	Language	Response / Punctuation system - Comprehension	5	5	5	4	5	5	5	3	3	5	3	3	4	2	4	15	1	5	0.766667	No
Ítem Nº7	Language	Item - Coherence	5	5	5	5	5	5	3	3	4	3	1	1	4	2	4	15	1	5	0.666667	Yes
Ítem Nº7	Language	Response / Punctuation system - Coherence	5	5	5	5	5	5	3	3	3	4	2	1	4	2	4	15	1	5	0.683333	Yes
Ítem Nº7	Language	Item - Relevance	5	5	5	5	5	5	3	3	4	3	2	1	4	2	4	15	1	5	0.683333	Yes
Ítem Nº7	Language	Measurement procedure suitability	5	5	5	4	5	5	3	3	3	5	2	1	4	2	4	15	1	5	0.683333	Yes
Ítem Nº8	Arithmetic for money management	Item - Comprehension	5	5	5	5	5	5	5	3	5	5	4	3	5	3	5	15	1	5	0.883333	No
Ítem Nº8	Arithmetic for money management	Response / Punctuation system - Comprehension	5	5	5	5	5	5	5	3	5	5	4	2	5	3	5	15	1	5	0.866667	No
Ítem Nº8	Arithmetic for money management	Item - Coherence	5	5	5	5	5	5	5	3	4	3	3	3	5	3	5	15	1	5	0.816667	No
Ítem Nº8	Arithmetic for money management	Response / Punctuation system - Coherence	5	5	5	5	5	5	5	3	4	4	2	2	5	3	5	15	1	5	0.8	No
Ítem Nº8	Arithmetic for money management	Item - Relevance	5	5	5	5	5	5	5	3	4	3	3	4	5	3	5	15	1	5	0.833333	No
Ítem Nº8	Arithmetic for money management	Measurement procedure suitability	5	5	5	5	5	5	5	3	4	4	4	2	5	3	5	15	1	5	0.833333	No
Ítem Nº9	Attention-inhibition	Item - Comprehension	5	5	5	5	3	5	5	3	5	5	3	2	5	4	5	15	1	5	0.833333	No
Ítem Nº9	Attention-inhibition	Response / Punctuation system - Comprehension	5	5	5	5	5	5	5	3	5	5	3	3	5	4	5	15	1	5	0.883333	No
Ítem Nº9	Attention-inhibition	Item - Coherence	5	5	5	5	5	5	4	3	4	5	2	2	5	4	5	15	1	5	0.816667	No
Ítem Nº9	Attention-inhibition	Response / Punctuation system - Coherence	5	5	5	5	5	5	4	3	3	4	3	2	5	4	5	15	1	5	0.8	No
Ítem Nº9	Attention-inhibition	Item - Relevance	5	5	5	5	5	5	4	3	4	4	1	2	5	4	5	15	1	5	0.783333	No
Ítem Nº9	Attention-inhibition	Measurement procedure suitability	5	5	5	5	5	5	3	3	3	5	3	2	5	4	5	15	1	5	0.8	No
Ítem Nº10	Memory	Item - Comprehension	5	5	5	5	5	5	5	5	5	5	4	4	5	2	5	15	1	5	0.916667	No
Ítem Nº10	Memory	Response / Punctuation system - Comprehension	5	5	5	5	5	5	5	5	5	5	2	2	5	2	5	15	1	5	0.85	No
Ítem Nº10	Memory	Item - Coherence	5	5	5	5	5	5	5	5	5	4	3	3	5	2	5	15	1	5	0.866667	No
Ítem Nº10	Memory	Response / Punctuation system - Coherence	5	5	5	5	5	4	5	5	5	3	1	2	5	2	5	15	1	5	0.783333	No
Ítem Nº10	Memory	Item - Relevance	5	5	5	5	5	5	5	3	5	4	4	3	5	4	5	15	1	5	0.883333	No
Ítem Nº10	Memory	Measurement procedure suitability	5	5	5	5	5	5	5	5	5	3	4	3	5	2	5	15	1	5	0.866667	No
Ítem Nº11	Concentration	Item - Comprehension	4	5	5	5	5	5	5	5	5	5	4	2	5	2	5	15	1	5	0.866667	No
Ítem Nº11	Concentration	Response / Punctuation system - Comprehension	5	5	5	5	5	5	5	5	5	5	2	2	5	2	5	15	1	5	0.85	No
Ítem Nº11	Concentration	Item - Coherence	5	5	5	5	5	5	5	5	4	4	4	3	5	2	5	15	1	5	0.866667	No
Ítem Nº11	Concentration	Response / Punctuation system - Coherence	5	5	5	5	5	5	5	5	5	4	2	3	5	2	5	15	1	5	0.85	No
Ítem Nº11	Concentration	Item - Relevance	5	5	5	5	5	5	5	3	4	4	4	3	5	2	5	15	1	5	0.833333	No
Ítem Nº11	Concentration	Measurement procedure suitability	5	5	5	5	5	5	5	5	5	5	4	2	5	2	5	15	1	5	0.883333	No
Ítem Nº12	Cognitive activities	Item - Comprehension	5	5	5	5	3	5	5	5	5	5	4	4	5	2	5	15	1	5	0.883333	No
Ítem Nº12	Cognitive activities	Response / Punctuation system - Comprehension	5	5	5	5	3	5	5	5	5	5	4	4	5	2	5	15	1	5	0.883333	No
Ítem Nº12	Cognitive activities	Item - Coherence	5	5	5	5	3	5	5	5	4	2	4	2	5	4	5	15	1	5	0.816667	No
Ítem Nº12	Cognitive activities	Response / Punctuation system - Coherence	5	5	5	5	3	5	5	5	5	4	4	3	5	2	5	15	1	5	0.85	No
Ítem Nº12	Cognitive activities	Item - Relevance	5	5	5	5	3	5	5	3	3	2	4	2	5	4	5	15	1	5	0.766667	No
Ítem Nº12	Cognitive activities	Measurement procedure suitability	5	5	2	3	3	5	5	5	5	5	4	4	5	2	5	15	1	5	0.8	No
Ítem Nº13	Loneliness	Item - Comprehension	5	5	5	5	5	5	5	5	5	5	4	5	5	4	5	15	1	5	0.966667	No
Ítem Nº13	Loneliness	Response / Punctuation system - Comprehension	5	5	5	5	5	5	5	5	5	5	4	4	5	4	5	15	1	5	0.95	No
Ítem Nº13	Loneliness	Item - Coherence	5	5	5	5	5	5	5	5	5	5	5	4	5	4	5	15	1	5	0.966667	No
Ítem Nº13	Loneliness	Response / Punctuation system - Coherence	5	5	5	5	5	5	5	5	5	5	3	3	5	4	5	15	1	5	0.916667	No
Ítem Nº13	Loneliness	Item - Relevance	5	5	5	5	5	5	5	3	5	5	5	4	5	4	5	15	1	5	0.933333	No
Ítem Nº13	Loneliness	Measurement procedure suitability	5	5	5	5	5	5	5	5	5	5	4	3	5	4	5	15	1	5	0.933333	No
Ítem Nº14	Sadness	Item - Comprehension	5	5	5	5	5	5	5	5	5	3	4	4	5	4	5	15	1	5	0.916667	No
Ítem Nº14	Sadness	Response / Punctuation system - Comprehension	5	5	5	5	5	5	5	5	5	3	4	4	5	4	5	15	1	5	0.916667	No
Ítem Nº14	Sadness	Item - Coherence	5	5	5	5	5	5	5	5	4	4	4	4	5	4	5	15	1	5	0.916667	No
Ítem Nº14	Sadness	Response / Punctuation system - Coherence	5	5	5	5	5	5	5	5	5	4	3	3	5	4	5	15	1	5	0.9	No
Ítem Nº14	Sadness	Item - Relevance	5	5	5	5	5	5	5	3	4	4	4	4	5	4	5	15	1	5	0.883333	No
Ítem Nº14	Sadness	Measurement procedure suitability	5	5	5	5	5	5	5	5	5	4	4	3	5	4	5	15	1	5	0.916667	No
Ítem Nº15	Fear	Item - Comprehension	5	5	2	5	5	5	4	5	4	4	3	3	4	2	5	15	1	5	0.766667	No
Ítem Nº15	Fear	Response / Punctuation system - Comprehension	5	5	5	5	5	5	5	5	4	4	4	2	4	2	5	15	1	5	0.833333	No
Ítem Nº15	Fear	Item - Coherence	5	5	5	5	5	5	3	5	2	3	2	2	4	2	5	15	1	5	0.716667	No
Ítem Nº15	Fear	Response / Punctuation system - Coherence	5	5	5	5	5	5	4	5	3	4	3	2	4	2	5	15	1	5	0.783333	No
Ítem Nº15	Fear	Item - Relevance	5	5	5	5	5	5	3	3	2	3	2	2	4	2	5	15	1	5	0.683333	Yes
Ítem Nº15	Fear	Measurement procedure suitability	5	5	5	5	5	5	4	5	3	4	4	2	4	2	5	15	1	5	0.8	No
Ítem Nº16	Irritability	Item - Comprehension	5	5	5	5	5	5	5	5	4	3	4	4	5	3	5	15	1	5	0.883333	No
Ítem Nº16	Irritability	Response / Punctuation system - Comprehension	5	5	5	5	5	5	5	5	4	4	4	4	5	3	5	15	1	5	0.9	No
Ítem Nº16	Irritability	Item - Coherence	5	5	5	5	5	5	5	5	3	3	4	4	5	3	5	15	1	5	0.866667	No
Ítem Nº16	Irritability	Response / Punctuation system - Coherence	5	5	5	5	5	5	5	5	3	3	4	4	5	3	5	15	1	5	0.866667	No
Ítem Nº16	Irritability	Item - Relevance	5	5	5	5	5	5	4	3	3	3	4	4	5	3	5	15	1	5	0.816667	No
Ítem Nº16	Irritability	Measurement procedure suitability	5	5	5	5	5	5	5	5	3	3	4	4	5	3	5	15	1	5	0.866667	No
Ítem Nº17	Self-efficacy	Item - Comprehension	5	5	5	4	5	5	5	5	4	5	3	3	5	2	5	15	1	5	0.85	No
Ítem Nº17	Self-efficacy	Response / Punctuation system - Comprehension	5	5	5	5	5	5	5	5	4	5	4	4	5	2	5	15	1	5	0.9	No
Ítem Nº17	Self-efficacy	Item - Coherence	5	5	5	5	5	5	5	5	4	3	4	4	5	4	5	15	1	5	0.9	No
Ítem Nº17	Self-efficacy	Response / Punctuation system - Coherence	5	5	5	5	5	5	5	5	3	5	4	4	5	2	5	15	1	5	0.883333	No
Ítem Nº17	Self-efficacy	Item - Relevance	5	5	5	5	5	5	5	3	4	3	4	4	5	4	5	15	1	5	0.866667	No
Ítem Nº17	Self-efficacy	Measurement procedure suitability	5	5	5	5	5	5	5	5	2	5	4	4	5	2	5	15	1	5	0.866667	No
Ítem Nº18	Life satisfaction	Item - Comprehension	5	5	5	5	5	5	5	5	5	2	4	2	5	4	5	15	1	5	0.866667	No
Ítem Nº18	Life satisfaction	Response / Punctuation system - Comprehension	5	5	5	5	5	5	5	5	5	4	4	4	5	4	5	15	1	5	0.933333	No
Ítem Nº18	Life satisfaction	Item - Coherence	5	5	5	5	5	5	5	5	3	3	4	4	5	4	5	15	1	5	0.883333	No
Ítem Nº18	Life satisfaction	Response / Punctuation system - Coherence	5	5	5	5	5	5	5	5	4	4	3	4	5	4	5	15	1	5	0.9	No
Ítem Nº18	Life satisfaction	Item - Relevance	5	5	5	5	5	5	5	3	2	3	4	5	5	4	5	15	1	5	0.85	No
Ítem Nº18	Life satisfaction	Measurement procedure suitability	5	5	5	5	5	5	5	5	3	4	4	4	5	4	5	15	1	5	0.9	No
Ítem Nº19	Economical support	Item - Comprehension	5	5	5	5	4	5	5	5	5	5	3	4	5	4	5	15	1	5	0.916667	No
Ítem Nº19	Economical support	Response / Punctuation system - Comprehension	5	5	5	5	5	5	5	5	5	5	4	4	5	4	5	15	1	5	0.95	No
Ítem Nº19	Economical support	Item - Coherence	5	5	5	5	5	5	5	5	5	5	4	5	5	4	5	15	1	5	0.966667	No
Ítem Nº19	Economical support	Response / Punctuation system - Coherence	5	5	5	5	5	5	5	5	5	5	4	4	5	4	5	15	1	5	0.95	No
Ítem Nº19	Economical support	Item - Relevance	5	5	5	5	5	5	5	3	5	5	5	5	5	4	5	15	1	5	0.95	No
Ítem Nº19	Economical support	Measurement procedure suitability	5	5	5	5	5	5	5	5	5	5	4	4	5	4	5	15	1	5	0.95	No
Ítem Nº20	Family interaction	Item - Comprehension	5	5	5	5	5	5	5	5	5	5	4	4	5	4	5	15	1	5	0.95	No
Ítem Nº20	Family interaction	Response / Punctuation system - Comprehension	5	5	5	5	5	5	5	5	5	5	4	4	5	4	5	15	1	5	0.95	No
Ítem Nº20	Family interaction	Item - Coherence	5	5	5	2	5	5	5	5	4	3	4	5	5	4	5	15	1	5	0.866667	No
Ítem Nº20	Family interaction	Response / Punctuation system - Coherence	5	5	5	5	5	5	5	5	4	5	3	4	5	4	5	15	1	5	0.916667	No
Ítem Nº20	Family interaction	Item - Relevance	5	5	5	4	5	5	5	3	4	5	4	5	5	4	5	15	1	5	0.9	No
Ítem Nº20	Family interaction	Measurement procedure suitability	5	5	5	5	5	5	5	5	4	5	4	4	5	4	5	15	1	5	0.933333	No
Ítem Nº21	Social interaction	Item - Comprehension	5	5	5	5	5	5	5	5	5	5	4	4	5	4	5	15	1	5	0.95	No
Ítem Nº21	Social interaction	Response / Punctuation system - Comprehension	5	5	5	5	5	5	5	5	5	5	4	2	5	4	5	15	1	5	0.916667	No
Ítem Nº21	Social interaction	Item - Coherence	5	5	5	2	5	5	5	5	4	3	4	4	5	4	5	15	1	5	0.85	No
Ítem Nº21	Social interaction	Response / Punctuation system - Coherence	5	5	5	5	5	5	5	5	4	4	3	3	5	4	5	15	1	5	0.883333	No
Ítem Nº21	Social interaction	Item - Relevance	5	5	5	5	5	5	5	3	4	3	4	4	5	4	5	15	1	5	0.866667	No
Ítem Nº21	Social interaction	Measurement procedure suitability	5	5	5	4	5	5	5	5	4	5	4	4	5	4	5	15	1	5	0.916667	No
Ítem Nº22	Participation in ludic and social activities	Item - Comprehension	5	5	5	5	5	5	5	5	5	5	4	4	5	4	5	15	1	5	0.95	No
Ítem Nº22	Participation in ludic and social activities	Response / Punctuation system - Comprehension	5	5	5	5	5	5	5	5	5	5	4	3	5	4	5	15	1	5	0.933333	No
Ítem Nº22	Participation in ludic and social activities	Item - Coherence	5	5	5	5	5	5	5	5	5	5	4	4	5	4	5	15	1	5	0.95	No
Ítem Nº22	Participation in ludic and social activities	Response / Punctuation system - Coherence	5	5	5	5	5	5	5	5	4	5	3	2	5	4	5	15	1	5	0.883333	No
Ítem Nº22	Participation in ludic and social activities	Item - Relevance	5	5	5	5	5	5	5	3	5	5	4	4	5	4	5	15	1	5	0.916667	No
Ítem Nº22	Participation in ludic and social activities	Measurement procedure suitability	5	5	5	5	5	5	5	5	5	5	4	4	5	4	5	15	1	5	0.95	No
Ítem Nº23	Communication ability	Item - Comprehension	5	5	5	5	5	5	5	5	5	5	2	2	4	4	5	15	1	5	0.866667	No
Ítem Nº23	Communication ability	Response / Punctuation system - Comprehension	5	5	5	5	5	5	5	5	5	5	3	4	4	4	5	15	1	5	0.916667	No
Ítem Nº23	Communication ability	Item - Coherence	5	5	5	5	5	5	4	5	4	4	3	3	4	4	5	15	1	5	0.85	No
Ítem Nº23	Communication ability	Response / Punctuation system - Coherence	5	5	5	5	5	5	4	5	5	5	3	3	4	4	5	15	1	5	0.883333	No
Ítem Nº23	Communication ability	Item - Relevance	5	5	5	5	5	5	4	3	3	4	3	2	4	4	5	15	1	5	0.783333	No
Ítem Nº23	Communication ability	Measurement procedure suitability	5	5	5	5	5	5	4	5	5	5	4	4	4	4	5	15	1	5	0.916667	No
Ítem Nº24	Receiving help	Item - Comprehension	5	5	5	5	5	5	5	5	5	5	3	4	5	4	5	15	1	5	0.933333	No
Ítem Nº24	Receiving help	Response / Punctuation system - Comprehension	5	5	5	5	5	5	5	5	5	5	4	4	5	4	5	15	1	5	0.95	No
Ítem Nº24	Receiving help	Item - Coherence	5	5	5	5	5	5	5	5	4	3	4	4	5	4	5	15	1	5	0.9	No
Ítem Nº24	Receiving help	Response / Punctuation system - Coherence	5	5	5	5	5	5	5	5	3	5	4	4	5	4	5	15	1	5	0.916667	No
Ítem Nº24	Receiving help	Item - Relevance	5	5	5	5	5	5	5	3	4	3	4	5	5	4	5	15	1	5	0.883333	No
Ítem Nº24	Receiving help	Measurement procedure suitability	5	5	5	5	5	5	5	5	4	5	4	4	5	4	5	15	1	5	0.933333	No
