# Supplementary material for: Development and content validity of the evaluation of multidimensional functioning and risks in aging scale
Source: PeerJ. 2025 Dec 9;13:e20108. doi: 10.7717/peerj.20108 (PMC12700117; doi:10.7717/peerj.20108)
Supplement: Supplemental Information 8 [file peerj-13-20108-s008.xlsx]

## Sheet: Older Adults Database
Older adult	MoCA (score)	Included (based on MoCA cut-off)	Age (years)	Sex	Height (m)	Weight (kg)	Completed eduactional level	Studied years	Marital status	Laboral status	EMFRA - Achives to respond/complete - Item 1	EMFRA - Achives to respond/complete - Item 2	EMFRA - Achives to respond/complete - Item 3	EMFRA - Achives to respond/complete - Item 4	EMFRA - Achives to respond/complete - Item 5	EMFRA - Achives to respond/complete - Item 6	EMFRA - Achives to respond/complete - Item 7	EMFRA - Achives to respond/complete - Item 8	EMFRA - Achives to respond/complete - Item 9	EMFRA - Achives to respond/complete - Item 10	EMFRA - Achives to respond/complete - Item 11	EMFRA - Achives to respond/complete - Item 12	EMFRA - Achives to respond/complete - Item 13	EMFRA - Achives to respond/complete - Item 14	EMFRA - Achives to respond/complete - Item 15	EMFRA - Achives to respond/complete - Item 16	EMFRA - Achives to respond/complete - Item 17	EMFRA - Achives to respond/complete - Item 18	EMFRA - Achives to respond/complete - Item 19	EMFRA - Achives to respond/complete - Item 20	EMFRA - Achives to respond/complete - Item 21	EMFRA - Achives to respond/complete - Item 22	EMFRA - Difficulty question - Item 1	EMFRA - Difficulty question - Item 2	EMFRA - Difficulty question - Item 3	EMFRA - Difficulty question - Item 4	EMFRA - Difficulty question - Item 5	EMFRA - Difficulty question - Item 6	EMFRA - Difficulty question - Item 7	EMFRA - Difficulty question - Item 8	EMFRA - Difficulty question - Item 9	EMFRA - Difficulty question - Item 10	EMFRA - Difficulty question - Item 11	EMFRA - Difficulty question - Item 12	EMFRA - Difficulty question - Item 13	EMFRA - Difficulty question - Item 14	EMFRA - Difficulty question - Item 15	EMFRA - Difficulty question - Item 16	EMFRA - Difficulty question - Item 17
OA - 1	27	Yes	66	Female	1.57	60	High school	15	Divorced	Retired	Yes	Yes	Yes	Yes	Yes	Yes	Yes	Yes	Yes	Yes	Yes	Yes	Yes	Yes	Yes	Yes	Yes	Yes	Yes	Yes	Yes	Yes	Not difficult at all	Not difficult at all	Not difficult at all	Not difficult at all	Somewhat difficult	Not difficult at all	Not difficult at all	Not difficult at all	Not difficult at all	Not difficult at all	Not difficult at all	Not difficult at all	Not difficult at all	Not difficult at all	Not difficult at all	Not difficult at all	Not difficult at all
OA - 2	28	Yes	65	Male	1.7	80	Universitary	18	Married	Retired	Yes	Yes	Yes	Yes	Yes	Yes	Yes	Yes	Yes	Yes	Yes	Yes	Yes	Yes	Yes	Yes	Yes	Yes	Yes	Yes	Yes	Yes	Not difficult at all	Not difficult at all	Not difficult at all	Not difficult at all	Not difficult at all	Not difficult at all	Not difficult at all	Not difficult at all	Not difficult at all	Not difficult at all	Not difficult at all	Not difficult at all	Not difficult at all	Not difficult at all	Not difficult at all	Not difficult at all	Not difficult at all
OA - 3	28	Yes	72	Female	1.66	78	FP	18	Married	Retired	Yes	Yes	Yes	Yes	Yes	Yes	Yes	Yes	Yes	Yes	Yes	Yes	Yes	Yes	Yes	Yes	Yes	Yes	Yes	Yes	Yes	Yes	Not difficult at all	Not difficult at all	Not difficult at all	Not difficult at all	Not difficult at all	Not difficult at all	Not difficult at all	Not difficult at all	Not difficult at all	Not difficult at all	Not difficult at all	Not difficult at all	Not difficult at all	Not difficult at all	Not difficult at all	Not difficult at all	Not difficult at all
OA - 4	22	No
OA - 5	28	Yes	71	Female	1.6	79	Universitary	24	Married	Unpaid domestic worker	Yes	Yes	Yes	Yes	Yes	Yes	Yes	Yes	Yes	Yes	Yes	Yes	Yes	Yes	Yes	Yes	Yes	Yes	Yes	Yes	Yes	Yes	Not difficult at all	Not difficult at all	Not difficult at all	Not difficult at all	Not difficult at all	Not difficult at all	Not difficult at all	Not difficult at all	Not difficult at all	Not difficult at all	Not difficult at all	Not difficult at all	Not difficult at all	Not difficult at all	Not difficult at all	Not difficult at all	Not difficult at all
OA - 6	29	Yes	66	Female	1.7	63	High school	18	Married	Active	Yes	Yes	Yes	Yes	Yes	Yes	Yes	Yes	Yes	Yes	Yes	Yes	Yes	Yes	Yes	Yes	Yes	Yes	Yes	Yes	Yes	Yes	Not difficult at all	Not difficult at all	Not difficult at all	Not difficult at all	Not difficult at all	Not difficult at all	Not difficult at all	Not difficult at all	Not difficult at all	Not difficult at all	Not difficult at all	Not difficult at all	Not difficult at all	Not difficult at all	Not difficult at all	Not difficult at all	Not difficult at all
OA - 7	27	Yes	72	Male	1.72	75	Universitary	18	Married	Retired	Yes	Yes	Yes	Yes	Yes	Yes	Yes	Yes	Yes	Yes	Yes	Yes	Yes	Yes	Yes	Yes	Yes	Yes	Yes	Yes	Yes	Yes	Not difficult at all	Not difficult at all	Not difficult at all	Not difficult at all	Not difficult at all	Not difficult at all	Not difficult at all	Not difficult at all	Not difficult at all	Not difficult at all	Not difficult at all	Not difficult at all	Not difficult at all	Not difficult at all	Not difficult at all	Not difficult at all	Not difficult at all
OA - 8	28	Yes	79	Female	1.58	64	Universitary	23	Married	Retired	Yes	Yes	Yes	Yes	No	Yes	Yes	Yes	Yes	Yes	Yes	Yes	Yes	Yes	No	No	Yes	Yes	Yes	Yes	Yes	Yes	Not difficult at all	Not difficult at all	Not difficult at all	Not difficult at all	Not difficult at all	Not difficult at all	Not difficult at all	Not difficult at all	Not difficult at all	Not difficult at all	Not difficult at all	Not difficult at all	Not difficult at all	Not difficult at all	Not difficult at all	Not difficult at all	Not difficult at all
OA - 9	29	Yes	65	Male	1.62	58	Universitary	23	Married	Retired	Yes	Yes	No	No	Yes	Yes	Yes	Yes	Yes	Yes	Yes	Yes	Yes	Yes	Yes	Yes	Yes	Yes	Yes	Yes	Yes	Yes	Not difficult at all	Not difficult at all	Not difficult at all	Not difficult at all	Not difficult at all	Not difficult at all	Not difficult at all	Not difficult at all	Not difficult at all	Not difficult at all	Not difficult at all	Not difficult at all	Not difficult at all	Not difficult at all	Not difficult at all	Not difficult at all	Not difficult at all
OA - 10	22	No
OA - 11	30	Yes	67	Female	1.57	58	Universitary	27	Divorced	Active	Yes	Yes	No	Yes	Yes	Yes	Yes	Yes	Yes	Yes	Yes	No	Yes	Yes	Yes	Yes	Yes	Yes	Yes	Yes	Yes	Yes	Not difficult at all	Not difficult at all	Not difficult at all	Not difficult at all	Not difficult at all	Not difficult at all	Not difficult at all	Not difficult at all	Not difficult at all	Not difficult at all	Somewhat difficult	Not difficult at all	Not difficult at all	Not difficult at all	Not difficult at all	Not difficult at all	Not difficult at all
OA - 12	29	Yes	77	Male	1.76	103	Universitary	25	Married	Retired	Yes	Yes	No	Yes	Yes	Yes	Yes	Yes	Yes	Yes	Yes	Yes	Yes	Yes	Yes	Yes	Yes	Yes	Yes	Yes	Yes	Yes	Not difficult at all	Not difficult at all	Not difficult at all	Not difficult at all	Not difficult at all	Not difficult at all	Not difficult at all	Not difficult at all	Not difficult at all	Not difficult at all	Not difficult at all	Not difficult at all	Not difficult at all	Not difficult at all	Not difficult at all	Not difficult at all	Not difficult at all
[truncated: 27 more columns]
